# Supplementary material for: Socioeconomic Disparities in Individual-Level Quality-Adjusted Life Years throughout Remaining Lifetimes: A National Representative Longitudinal Survey in China
Source: MDPI journal article supplement (doi:10.3390/ijerph20054612), 2023-03-05
Supplement: s1 [file s1]

**Table S1. Questions**

| <b>Short Form-36</b>                                                                                                                                                                         | <b>CHARLS</b>                                                                                                                                                                                                                           |
|----------------------------------------------------------------------------------------------------------------------------------------------------------------------------------------------|-----------------------------------------------------------------------------------------------------------------------------------------------------------------------------------------------------------------------------------------|
| <b>GENERAL HEALTH:</b>                                                                                                                                                                       |                                                                                                                                                                                                                                         |
| In general, would you say your health is:                                                                                                                                                    | <b>DA002</b> Next, I have some questions about your health. Would you say your health is very good, good, fair, poor or very poor?                                                                                                      |
| Compared to one year ago, how would you rate your health in general now?                                                                                                                     | <b>DA002_W2_1</b> Compared with your health when we talked with you in R's LAST IW MONTH, YEAR, would you say that your health is better now, about the same, or worse?                                                                 |
| <b>LIMITATIONS OF ACTIVITIES:</b><br><b>The following items are about activities you might do during a typical day. Does your health now limit you in these activities? If so, how much?</b> |                                                                                                                                                                                                                                         |
| Moderate activities, such as moving a table, pushing a vacuum cleaner, bowling, or playing golf.                                                                                             | <b>DB016</b> Because of health and memory problems, do you have any difficulties with doing household chores?<br>(Definition: By doing household chores, we mean house cleaning, doing dishes, making the bed, and arranging the house) |
| Lifting or carrying groceries                                                                                                                                                                | <b>DB008</b> Do you have difficulty with lifting or carrying weights over 10 jin, like a heavy bag of groceries?                                                                                                                        |
| Climbing several flights of stairs                                                                                                                                                           | <b>DB005</b> Do you have difficulty with climbing several flights of stairs without resting?                                                                                                                                            |
| Bending, kneeling, or stooping                                                                                                                                                               | <b>DB006</b> Do you have difficulty with stooping, kneeling, or crouching?                                                                                                                                                              |
| Walking more than a mile                                                                                                                                                                     | <b>DB002</b> Do you have difficulty with walking 1 km?                                                                                                                                                                                  |
| Walking one block                                                                                                                                                                            | <b>DB003</b> Do you have difficulty with walking 100 meters?                                                                                                                                                                            |

|                                                                                                                                                                                                                              |                                                                                                                                                                                                        |
|------------------------------------------------------------------------------------------------------------------------------------------------------------------------------------------------------------------------------|--------------------------------------------------------------------------------------------------------------------------------------------------------------------------------------------------------|
| Bathing or dressing yourself                                                                                                                                                                                                 | <b>DB010</b> Because of health and memory problems, do you have any difficulty with dressing? Dressing includes taking clothes out from a closet, putting them on, buttoning up, and fastening a belt. |
|                                                                                                                                                                                                                              | <b>DB011</b> Because of health and memory problems, do you have any difficulty with bathing or showering?                                                                                              |
|                                                                                                                                                                                                                              | <b>FC013</b> How many days of work did you miss in the past year due to health problems? 0...366 days                                                                                                  |
|                                                                                                                                                                                                                              | <b>FD030</b> How many days of work did you miss at this current job in the past year due to health problems? 0...366 days                                                                              |
|                                                                                                                                                                                                                              | <b>FH004</b> How many days of work did you miss in the past year due to health problems? 0...366 days                                                                                                  |
| <b>PAIN:</b>                                                                                                                                                                                                                 |                                                                                                                                                                                                        |
| How much bodily pain have you had during the past 4 weeks?                                                                                                                                                                   | <b>DA041</b> Are you often troubled with any body pains?                                                                                                                                               |
| <b>ENERGY AND EMOTIONS: These questions are about how you feel and how things have been with you during the last 4 weeks. For each question, please give the answer that comes closest to the way you have been feeling.</b> |                                                                                                                                                                                                        |
| Did you feel full of pep?                                                                                                                                                                                                    | <b>DC010</b> I had trouble keeping my mind on what I was doing. (<1 da; 1-2 days; 3-4 days; 5-7 days; DK; RF)                                                                                          |

|                                                                                                                |                                                                                                                                                                         |
|----------------------------------------------------------------------------------------------------------------|-------------------------------------------------------------------------------------------------------------------------------------------------------------------------|
| Have you felt so down in the dumps that nothing could cheer you up?                                            | <b>DC011</b> I felt depressed. (<1 da; 1-2 days; 3-4 days; 5-7 days; DK; RF)                                                                                            |
| Have you been a happy person?                                                                                  | <b>DC016</b> I was happy. (<1 da; 1-2 days; 3-4 days; 5-7 days; DK; RF)                                                                                                 |
| <b>GENERAL HEALTH:</b><br><b>How true or false is each of the following statements for you?</b>                |                                                                                                                                                                         |
| I expect my health to get worse.<br>(Definitely true; Mostly true; Don't know; Mostly false; Definitely false) | <b>DA002_W2_1</b> Compared with your health when we talked with you in R's LAST IW MONTH, YEAR, would you say that your health is better now, about the same, or worse? |
| My health is excellent.<br>(Definitely true; Mostly true; Don't know; Mostly false; Definitely false)          | <b>DA002</b> Next, I have some questions about your health. Would you say your health is very good, good, fair, poor or very poor?                                      |

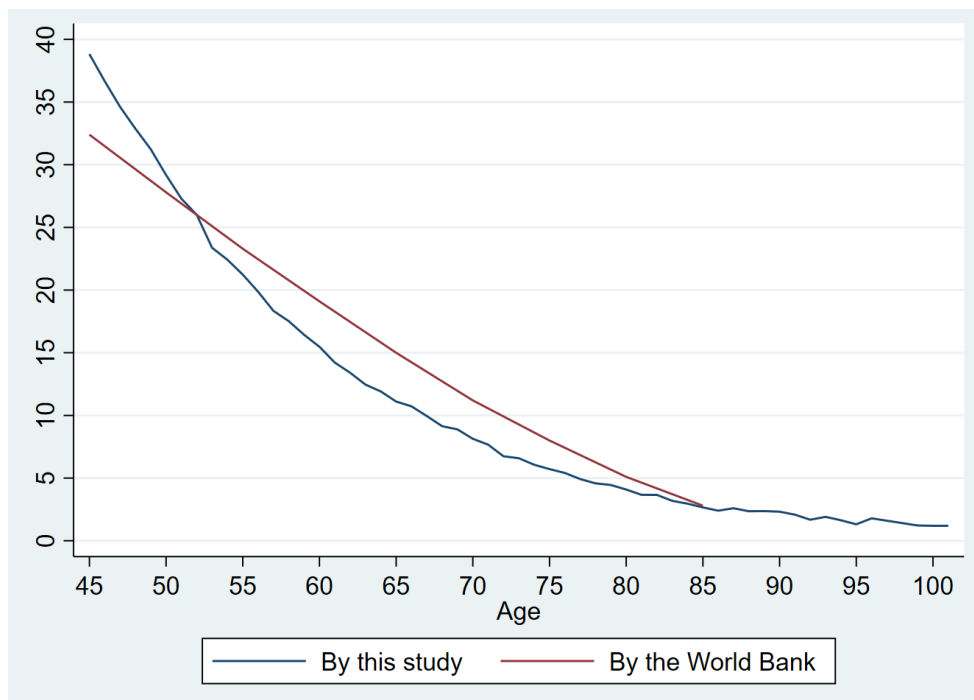

**Figure S1. Life expectancy by age**

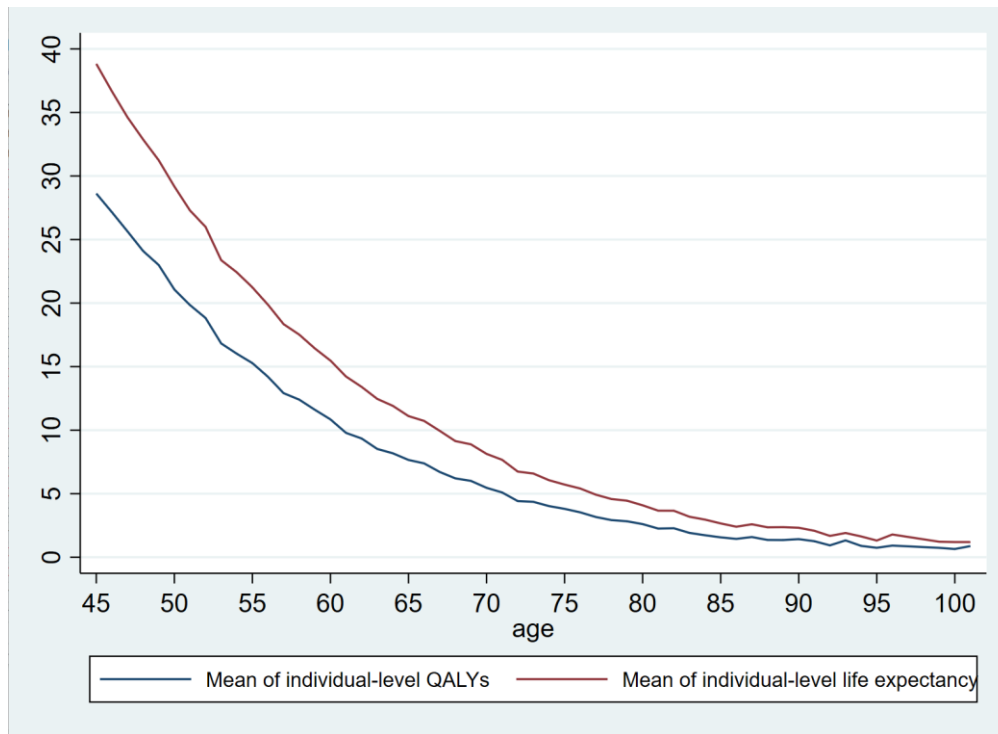

**Figure S2. Mean of individual-level QALYs and life expectancy by age**

**Table S2. The impact of socioeconomic status on QALYs**

| (1)                           |                       |                        |                       |                        |                        |                        |
|-------------------------------|-----------------------|------------------------|-----------------------|------------------------|------------------------|------------------------|
| INDEPENDENT VARIABLES         |                       | ln(QALYs)              |                       |                        |                        |                        |
|                               | Model 1               | Model 2                | Model 3               | Model 4                | Model 5                | Model 6                |
| Equivalent income:            |                       |                        |                       |                        |                        |                        |
| Quartile 1 (ref)              |                       |                        |                       |                        |                        |                        |
| Quartile 2                    | 0.1217***<br>(0.0171) | -0.0005<br>(0.0040)    |                       |                        |                        |                        |
| Quartile 3                    | 0.3120***<br>(0.0172) | 0.0079*<br>(0.0041)    |                       |                        |                        |                        |
| Quartile 4                    | 0.3265***<br>(0.0173) | 0.0086**<br>(0.0043)   |                       |                        |                        |                        |
| Education:                    |                       |                        |                       |                        |                        |                        |
| Primary school or below (ref) |                       |                        |                       |                        |                        |                        |
| Middle school                 |                       |                        | 0.3561***<br>(0.0135) | -0.0113***<br>(0.0034) |                        |                        |
| High school or above          |                       |                        | 0.7776***<br>(0.0201) | 0.1859***<br>(0.0051)  |                        |                        |
| Occupation:                   |                       |                        |                       |                        |                        |                        |
| Agriculture work (ref)        |                       |                        |                       |                        |                        |                        |
| Employed                      |                       |                        |                       |                        | 0.3752***<br>(0.0154)  | 0.0276***<br>(0.0037)  |
| Self-employed                 |                       |                        |                       |                        | 0.2781***<br>(0.0206)  | 0.0062<br>(0.0047)     |
| Retired or receded            |                       |                        |                       |                        | -0.0416<br>(0.0313)    | 0.0399***<br>(0.0071)  |
| Unemployed                    |                       |                        |                       |                        | -0.7068***<br>(0.0124) | -0.2430***<br>(0.0032) |
| Age                           |                       | -0.0473***<br>(0.0015) |                       | -0.0434***<br>(0.0014) |                        | -0.0486***<br>(0.0013) |
| Age^2                         |                       | -0.0001***<br>(0.0000) |                       | -0.0001***<br>(0.0000) |                        | -0.0000***<br>(0.0000) |
| Gender:                       |                       |                        |                       |                        |                        |                        |
| Male (ref)                    |                       |                        |                       |                        |                        |                        |
| Female                        |                       | 0.3152***<br>(0.0029)  |                       | 0.3263***<br>(0.0029)  |                        | 0.3457***<br>(0.0025)  |
| Marital Status:               |                       |                        |                       |                        |                        |                        |
| Married/Living together       |                       |                        |                       |                        |                        |                        |
| Single/Living alone           |                       | -0.1493***<br>(0.0047) |                       | -0.1470***<br>(0.0044) |                        | -0.1339***<br>(0.0039) |
| HRQoL                         |                       | 2.8641***<br>(0.0149)  |                       | 2.8134***<br>(0.0139)  |                        | 2.7278***<br>(0.0123)  |
| Living Areas:                 |                       |                        |                       |                        |                        |                        |

|                 |           |            |           |            |           |           |
|-----------------|-----------|------------|-----------|------------|-----------|-----------|
| The urban (ref) |           |            |           |            |           |           |
| The rural       |           | -0.0334*** |           | -0.0581*** |           | 0.0292*** |
|                 |           | (0.0031)   |           | (0.0029)   |           | (0.0026)  |
| Constant        | 2.1622*** | 3.3696***  | 2.0408*** | 3.2616***  | 2.4883*** | 3.4110*** |
|                 | (0.0122)  | (0.0488)   | (0.0112)  | (0.0456)   | (0.0081)  | (0.0408)  |
| Observations    | 15,809    | 15,809     | 15,918    | 15,918     | 15,918    | 15,918    |
| R-squared       | 0.0308    | 0.9472     | 0.0907    | 0.9535     | 0.2707    | 0.9637    |

(2)

| INDEPENDENT<br>VARIABLES         | <i>ln(QALYs)</i>  |                   |                   |                   |                   |                   |
|----------------------------------|-------------------|-------------------|-------------------|-------------------|-------------------|-------------------|
|                                  | Model 7           | Model 8           | Model 9           | Model 10          | Model 11          | Model 12          |
| Equivalent income:               |                   |                   |                   |                   |                   |                   |
| Quartile 1 (ref)                 |                   |                   |                   |                   |                   |                   |
| Quartile 2                       | 0.0006            | -0.0004           | <b>0.0827***</b>  | -0.0011           | <b>0.0769***</b>  | 0.0014            |
|                                  | (0.0038)          | (0.0038)          | <b>(0.0147)</b>   | (0.0033)          | <b>(0.0141)</b>   | (0.0030)          |
| Quartile 3                       | 0.0029            | 0.0009            | <b>0.2508***</b>  | <b>0.0105***</b>  | <b>0.2090***</b>  | <b>0.0079***</b>  |
|                                  | (0.0039)          | (0.0039)          | <b>(0.0150)</b>   | <b>(0.0034)</b>   | <b>(0.0144)</b>   | <b>(0.0031)</b>   |
| Quartile 4                       | <b>-0.0112***</b> | <b>-0.0132***</b> | <b>0.3328***</b>  | <b>0.0258***</b>  | <b>0.2421***</b>  | <b>0.0088***</b>  |
|                                  | <b>(0.0040)</b>   | <b>(0.0041)</b>   | <b>(0.0155)</b>   | <b>(0.0037)</b>   | <b>(0.0151)</b>   | <b>(0.0033)</b>   |
| Education:                       |                   |                   |                   |                   |                   |                   |
| Primary school or below<br>(ref) |                   |                   |                   |                   |                   |                   |
| Middle school                    | <b>0.3298***</b>  | <b>-0.0103***</b> |                   |                   | <b>0.2404***</b>  | <b>0.0053**</b>   |
|                                  | <b>(0.0136)</b>   | <b>(0.0034)</b>   |                   |                   | <b>(0.0117)</b>   | <b>(0.0027)</b>   |
| High school or above             | <b>0.7269***</b>  | <b>0.1893***</b>  |                   |                   | <b>0.6711***</b>  | <b>0.2245***</b>  |
|                                  | <b>(0.0207)</b>   | <b>(0.0052)</b>   |                   |                   | <b>(0.0180)</b>   | <b>(0.0041)</b>   |
| Occupation:                      |                   |                   |                   |                   |                   |                   |
| Agriculture work (ref)           |                   |                   |                   |                   |                   |                   |
| Employed                         |                   |                   | <b>0.2702***</b>  | <b>0.0216***</b>  | <b>0.1524***</b>  | -0.0015           |
|                                  |                   |                   | <b>(0.0158)</b>   | <b>(0.0038)</b>   | <b>(0.0155)</b>   | (0.0034)          |
| Self-employed                    |                   |                   | <b>0.1872***</b>  | 0.0012            | <b>0.1304***</b>  | -0.0019           |
|                                  |                   |                   | <b>(0.0207)</b>   | (0.0048)          | <b>(0.0199)</b>   | (0.0043)          |
| Retired or receded               |                   |                   | <b>-0.1606***</b> | <b>0.0323***</b>  | <b>-0.3032***</b> | -0.0057           |
|                                  |                   |                   | <b>(0.0314)</b>   | <b>(0.0072)</b>   | <b>(0.0303)</b>   | (0.0065)          |
| Unemployed                       |                   |                   | <b>-0.7611***</b> | <b>-0.2475***</b> | <b>-0.7884***</b> | <b>-0.2663***</b> |
|                                  |                   |                   | <b>(0.0125)</b>   | <b>(0.0032)</b>   | <b>(0.0121)</b>   | <b>(0.0029)</b>   |
| Age                              |                   | -0.0435***        |                   | -0.0483***        |                   | -0.0448***        |
|                                  |                   | (0.0014)          |                   | (0.0013)          |                   | (0.0011)          |
| Age^2                            |                   | -0.0001***        |                   | -0.0000***        |                   | -0.0001***        |
|                                  |                   | (0.0000)          |                   | (0.0000)          |                   | (0.0000)          |
| Gender:                          |                   |                   |                   |                   |                   |                   |
| Male (ref)                       |                   |                   |                   |                   |                   |                   |

|                         |                       |                        |                       |                        |                       |                        |
|-------------------------|-----------------------|------------------------|-----------------------|------------------------|-----------------------|------------------------|
| Female                  |                       | 0.3262***<br>(0.0029)  |                       | 0.3445***<br>(0.0025)  |                       | 0.3592***<br>(0.0023)  |
| Marital Status:         |                       |                        |                       |                        |                       |                        |
| Married/Living together |                       |                        |                       |                        |                       |                        |
| Single/Living alone     |                       | -0.1483***<br>(0.0044) |                       | -0.1297***<br>(0.0039) |                       | -0.1258***<br>(0.0035) |
| HRQoL                   |                       | 2.8183***<br>(0.0140)  |                       | 2.7167***<br>(0.0124)  |                       | 2.6605***<br>(0.0111)  |
| Living Areas:           |                       |                        |                       |                        |                       |                        |
| The urban (ref)         |                       |                        |                       |                        |                       |                        |
| The rural               |                       | -0.0562***<br>(0.0030) |                       | 0.0252***<br>(0.0027)  |                       | 0.0041*<br>(0.0024)    |
| Constant                | 1.9333***<br>(0.0143) | 3.2618***<br>(0.0460)  | 2.3669***<br>(0.0113) | 3.4027***<br>(0.0410)  | 2.2096***<br>(0.0129) | 3.2931***<br>(0.0366)  |
| Observations            | 15,809                | 15,809                 | 15,809                | 15,809                 | 15,809                | 15,809                 |
| R-squared               | 0.1050                | 0.9534                 | 0.2959                | 0.9638                 | 0.3530                | 0.9713                 |

*Notes.* The estimates stem from linear regression. Standard errors are in parentheses.  
Significance levels: \* $p < 0.1$ ; \*\* $p < 0.05$ ; \*\*\* $p < 0.01$ .
